# Supplementary material for: Effects of a 12-week multicomponent intervention on 24-hour movement behaviour and physical fitness in parents and their children: a mediation analysis
Source: Research Square preprint supplement (doi:10.21203/rs.3.rs-6814638/v1), 2025-06-17
Supplement: Supplementary file 1 [file 5814be502f10c74c53e4b2bb.docx]

**Supplementary material**

| **Table 1S**. Sociodemographic, 24-hour movement behaviour, and physical fitness of baseline participants according to missing data. | | | | |
| --- | --- | --- | --- | --- |
| **Variables** | **Overall (n = 78)***1* | **Missing data** | | **p-value***2* |
| **No (n = 68)***1* | **Yes (n = 10)***1* |
| **Parents** | **Median (IQR)** | **Median (IQR)** | **Median (IQR)** |  |
| Age (years) | 41.00 (38.00, 45.00) | 41.00 (38.00, 45.00) | 42.00 (32.00, 45.00) | 0,787 |
| Sex |  |  |  | 0,482 |
| Men | 26 (33.33%) | 24 (35.29%) | 2 (20.00%) |  |
| Women | 52 (66.67%) | 44 (64.71%) | 8 (80.00%) |  |
| MVPA (min/week) | 360.00 (100.00, 580.00) | 365.00 (180.00, 600.00) | 157.50 (60.00, 270.00) | 0,060 |
| SB (hours/day) | 2.00 (0.50, 6.00) | 2.50 (0.50, 6.00) | 2.00 (0.33, 10.00) | >0,999 |
| Missing data | 3 | 0 | 3 |  |
| Sleep (hours/day) | 8.57 (7.93, 9.24) | 8.64 (8.02, 9.24) | 7.89 (7.43, 8.45) | **0,011** |
| Global physical fitness (score) | 3.00 (2.60, 3.80) | 3.00 (2.60, 3.80) | 3.00 (2.40, 3.40) | 0,827 |
| **Children** | **Median (IQR)** | **Median (IQR)** | **Median (IQR)** |  |
| Age (years) | 11.00 (10.00, 11.00) | 11.00 (10.00, 11.00) | 10.50 (10.00, 11.00) | 0,404 |
| Sex |  |  |  | 0,716 |
| Boys | 22 (28.21%) | 20 (29.41%) | 2 (20.00%) |  |
| Girls | 56 (71.79%) | 48 (70.59%) | 8 (80.00%) |  |
| School type |  |  |  | 0,711 |
| Private | 58 (74.36%) | 51 (75.00%) | 7 (70.00%) |  |
| Public | 20 (25.64%) | 17 (25.00%) | 3 (30.00%) |  |
| In-school MVPA (min/day) | 17.78 (16.98, 19.99) | 17.78 (17.06, 20.88) | 17.70 (16.98, 19.06) | 0,573 |
| Out-of-school MVPA (min/day) | 7.28 (6.63, 8.24) | 7.66 (6.95, 8.24) | 6.31 (5.35, 6.76) | **0,005** |
| Weekend MVPA (min/day) | 62.34 (55.56, 68.27) | 63.97 (58.10, 68.27) | 53.87 (48.78, 65.73) | 0,076 |
| Out-of-school SB (hours/day) | 1.04 (1.02, 1.06) | 1.03 (1.02, 1.05) | 1.05 (1.05, 1.06) | **0,047** |
| Sleep (hours/day) | 9.68 (9.21, 10.36) | 9.70 (9.21, 10.32) | 9.51 (9.02, 10.57) | 0,735 |
| Missing data | 5 | 0 | 5 |  |
| Global physical fitness (score) | 3.80 (3.00, 4.40) | 3.80 (2.90, 4.40) | 3.70 (3.40, 4.20) | 0,708 |
| *1* IQR: interquartile range; n (%). | | | | |
| *2* Wilcoxon rank sum test; Fisher’s exact test.  MVPA: moderate-to-vigorous physical activity; SB: sedentary behaviour. | | | | |
